# Supplementary material
Source: PubMed Central journal article supplement (PMC8646904)
Supplement: NMO-34-0-s002.pdf [file NMO-34-0-s002.pdf]

---

Start of Block: Default Question Block

---

Q1 Have you been diagnosed with COVID-19, either by a positive PCR, positive antibody test, or by a medical professional based on symptoms?

Yes (1)

No (2)

---

Q2 Were you admitted to the hospital for COVID-19?

Yes (1)

No (2)

---

Q3 Did you require a breathing tube for COVID-19?

Yes (1)

No (2)

---

Q4 Approximately how long ago was your initial diagnosis of COVID-19?

Less than 1 month ago (1)

1 to 3 months ago (2)

3 to 6 months ago (3)

More than 6 months ago (4)

---

Q5 To the best of your knowledge, did you receive any of the following treatments for COVID-19?

- Antibiotics (1)
  - Hydroxychloroquine (2)
  - Steroids (3)
- 

Q6 How old are you?

- Under 18 (1)
  - 18 - 29 (2)
  - 30 - 39 (3)
  - 40 - 49 (4)
  - 50 - 59 (5)
  - 60 - 69 (6)
  - 70 - 79 (7)
  - 80 or above (8)
- 

Q7 What is your gender?

- Male (1)
  - Female (2)
  - Other/prefer not to answer (3)
-

Q8 Which of the following best describes your race?

- White (1)
  - Black or African American (2)
  - American Indian or Alaska Native (3)
  - Asian (4)
  - Native Hawaiian or Pacific Islander (5)
  - Multiracial (6)
  - Other/prefer not to answer (7)
- 

Q9 Which of the following best describes your ethnicity?

- Hispanic (1)
  - Non-Hispanic (2)
  - Other/prefer not to answer (3)
- 

Q10 How were you diagnosed with COVID-19 (select all that apply)?

- PCR or rapid test (i.e. nasal swab) (1)
  - Antibody testing (2)
  - Other (such as based on symptoms or by chest x-ray) (3)
  - Unsure (4)
-

Q11 Did you have any of the following symptoms at the time of your COVID-19 diagnosis (select all that apply)?

- Fever (1)
  - Nausea/vomiting (2)
  - Abdominal pain (3)
  - Diarrhea (4)
  - Cough (5)
  - Shortness of breath (6)
  - Change in sense of taste or smell (7)
  - Sore throat (8)
  - Loss of appetite (9)
-

Q12 Before you were diagnosed with COVID-19, were you ever diagnosed with any of the following gastrointestinal disorders (select all that apply)?

- Inflammatory bowel disease (Crohn's disease or ulcerative colitis) (1)
  - Irritable bowel syndrome (2)
  - Celiac disease (3)
  - Other gastrointestinal illness (4)
  - No gastrointestinal problems (5)
- 

Q13 Before you were diagnosed with COVID-19, were you ever diagnosed with any of the following (select all that apply)?

- Depression (1)
  - Anxiety (2)
  - Fibromyalgia (3)
  - None of these (4)
- 

Q14 In the 3 months before you were diagnosed with COVID-19, did you have abdominal pain at least once a week?

- Yes (1)
  - No (2)
-

Q15 Were any of the following true (mark all that apply)

- The abdominal pain was related to bowel movements (1)
- I had a change in stool frequency (going more or less often than normal) (2)
- I had a change in stool form (more loose or more hard) (3)

Q16 During the 3 months before you were diagnosed with COVID-19, how severe was your pain on a scale from 0-10, with 0 meaning “no pain” and 10 meaning “very severe pain”

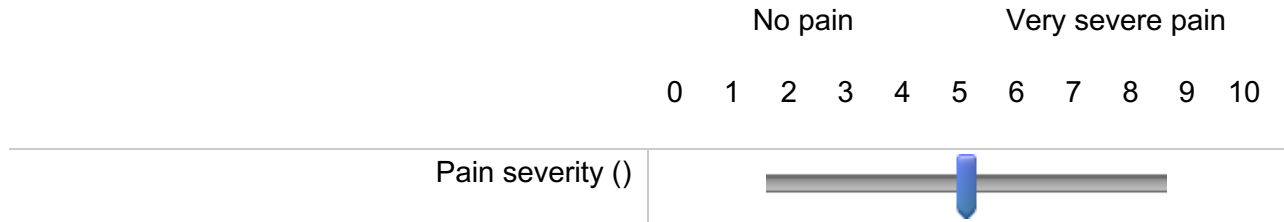

Q17 During the 3 months before you were diagnosed with COVID-19, what was the number of days you had abdominal pain out of a typical 10 day period.

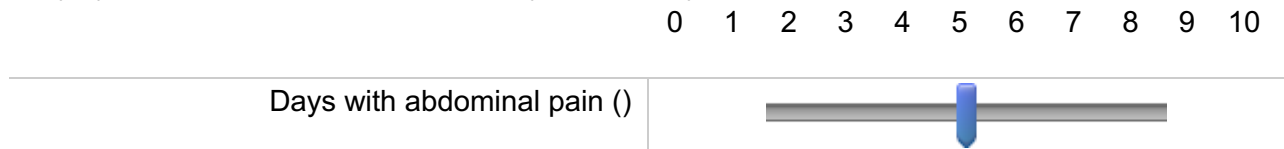

Q18 During the 3 months before you were diagnosed with COVID-19, did you suffer from abdominal distention (bloating, swollen, or tight stomach)?

- Yes (1)
- No (2)

Q19 During the 6 months before you were diagnosed with COVID-19, how severe was your abdominal distention on a scale from 0-10, 0 meaning no distention and 10 meaning most severe distention?

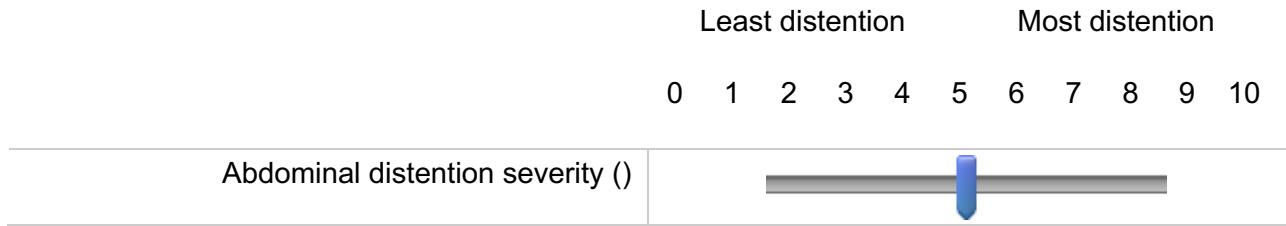

Q20 Before you were diagnosed with COVID-19, how dissatisfied were you with your bowel functioning, with 0 most satisfied, and 10 least satisfied?

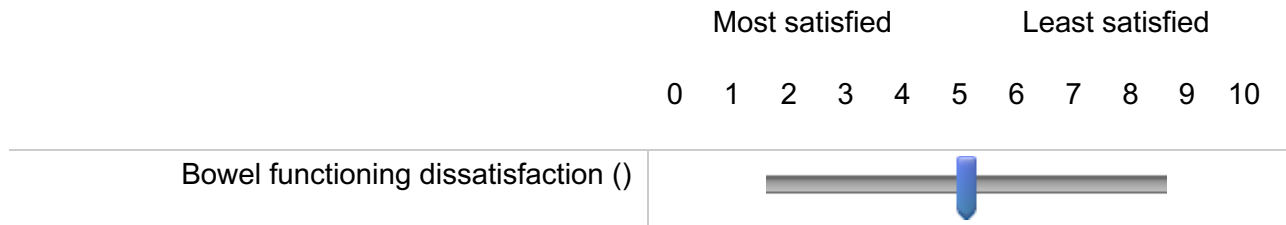

Q21 Before you were diagnosed with COVID-19, how much did abdominal pain or discomfort or altered bowel functioning affect or interfere with your life in general, with 0 meaning “not at all” and 10 meaning “completely”?

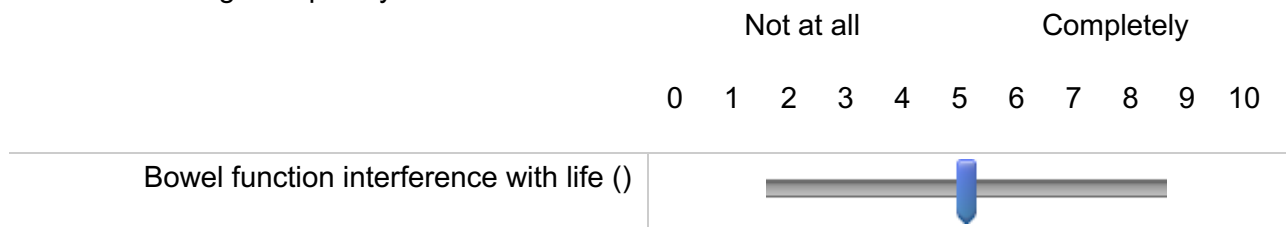

Q22 Before you were diagnosed with COVID-19, did you have symptoms of acid reflux such as heartburn or regurgitation?

Yes (1)

No (2)

-----  
Page Break

---



Q23 AFTER your diagnosis of COVID-19, have you had abdominal pain at least once a week?

Yes (1)

No (2)

---

Q24 AFTER your diagnosis of COVID-19, have any of the following been true (mark all that apply)?

The abdominal pain is related to bowel movements (1)

I have had a change in stool frequency (going more or less often than normal) (2)

I have had a change in stool form (more loose or more hard) (3)

---

Q25 AFTER your diagnosis of COVID-19, how severe was your pain on a scale from 0-10, with 0 meaning “no pain” and 10 meaning “very severe pain”?

No pain

Very severe pain

0 1 2 3 4 5 6 7 8 9 10

Pain severity ()

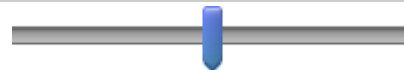

Q26 AFTER your diagnosis of COVID-19, please estimate the number of days you had abdominal pain out of the last 10.

0 1 2 3 4 5 6 7 8 9 10

Days with abdominal pain ()

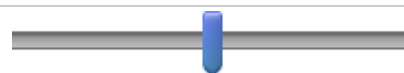

Q27 AFTER your diagnosis of COVID-19, have you suffered from abdominal distention (bloating, swollen, or tight stomach)?

Yes (1)

No (2)

Q28 AFTER your diagnosis of COVID-19, how severe has your abdominal distention been on a scale from 0-10?

Least distention                      Most distention  
0 1 2 3 4 5 6 7 8 9 10

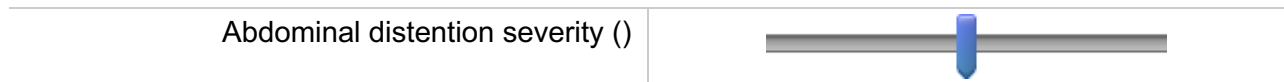

Q29 AFTER your diagnosis of COVID-19, how dissatisfied have you been with your bowel functioning, with 0 most satisfied, and 10 least satisfied?

Most satisfied                      Least satisfied  
0 1 2 3 4 5 6 7 8 9 10

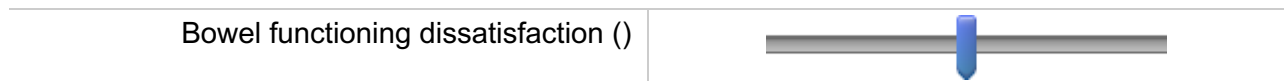

Q30 AFTER your diagnosis of COVID-19, how much has abdominal pain or discomfort or altered bowel functioning affect or interfere with your life in general, with 0 meaning “not at all” and 10 meaning “completely”?

Not at all                      Completely  
0 1 2 3 4 5 6 7 8 9 10

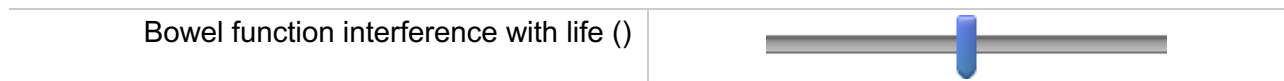

---

Q31 During the most recent 10 days, have you had diarrhea?

Yes (1)

No (2)

---

Q32 During the most recent 10 days, have you had constipation (having bowel movements less frequently than desired, or bowel movements that are hard, or having to strain to pass a bowel movement)?

Yes (1)

No (2)

---

Q33 During the most recent 10 days, have you had nausea or vomiting?

Yes (1)

No (2)

---

Q34 During the most recent 10 days, have you had abdominal pain?

Yes (1)

No (2)

---

Q35 During the most recent 10 days, have you had symptoms of acid reflux such as heartburn or regurgitation?

Yes (1)

No (2)

---

Q36 During the most recent 10 days, have you had an impaired sense of taste or smell?

Yes (23)

No (24)

---

Q37 AFTER your diagnosis of COVID-19, have you started any new medications for gastrointestinal symptoms such as heartburn, diarrhea, constipation, abdominal pain, or nausea/vomiting?

Yes (1)

No (2)

---

Q38 Did any of the following symptoms occur during your initial infection, resolve, and then return?

- Diarrhea (1)
  - Constipation (2)
  - Nausea or vomiting (3)
  - Heartburn or regurgitation (4)
  - Abdominal pain (5)
  - Loss of taste or smell (6)
-

Q39 In the most recent 10 days, have you experienced any of the following symptoms that were not present before your COVID diagnosis (check all that apply)?

- Fatigue (1)
- Headache (2)
- Shortness of breath or difficulty breathing (3)
- Difficulty concentrating or focusing (4)
- Cough (5)
- Changed sense of taste or smell (6)
- Inability to exercise or be active (7)
- Diarrhea (8)
- Muscle, bone, or body aches (9)
- Difficulty sleeping (10)
- Heart palpitations (11)
- Fevers or chills (12)
- Anxiety (13)
- Depression (14)
- Nausea or vomiting (15)
- Abdominal or stomach pain (16)

Constipation (17)

Heartburn or acid reflux (18)

---

Q40 (Last question) Where did you find this survey?

Survivor Corps (1)

Reddit forum (2)

Other/prefer not to answer (3)

End of Block: Default Question Block

---
